# Supplementary material for: Solid-state behaviors of imines: colossal biaxial positive thermal expansion, motion capability, and phase transitions
Source: Royal Society of Chemistry journal article supplement (doi:10.1039/d1ce00706h), 2021-01-01
Supplement: d1ce00706h1.pdf [file d1ce00706h1.pdf]

## Supplementary Information

# **Solid-state behaviors of imines: Colossal biaxial positive thermal expansion, motion capability, and phase transitions**

Navkiran Juneja, Ethan Zahid, Daniel K. Unruh, and Kristin M. Hutchins\*

Department of Chemistry and Biochemistry, Texas Tech University, 1204 Boston Avenue,  
Lubbock, Texas, 79409, United States

Email: kristin.hutchins@ttu.edu

### Contents:

|                                                                    |         |
|--------------------------------------------------------------------|---------|
| 1. Synthesis of Imines and Growth of Single Crystals               | S2      |
| 2. X-ray Diffraction Information and Data Tables                   | S3-S13  |
| 3. Thermal Expansion Data and Intermolecular Interaction Distances | S14     |
| 4. TGA and DSC Curves                                              | S15     |
| 5. Expansivity Indicatrix Diagram                                  | S16     |
| 6. Solution NMR Spectra of Materials                               | S17     |
| 7. Variation of the Unit Cell Parameters                           | S18     |
| 8. Images Showing Structural Changes as a Function of Temperature  | S19-S21 |
| 9. References                                                      | S22     |

## 1. Synthesis of Imines and Growth of Single Crystals

Benzene-1,4-diamine and 4-pyridine carboxaldehyde were purchased from Oakwood Chemical (730 Columbia Hwy, SC, USA). 4-Aminopyridine was purchased from Acros Organics (New Jersey, USA). Xylenes were purchased from Macron Fine Chemicals. Methanol, petroleum ether, hexanes and acetonitrile were purchased from Fisher Chemical (Fair Lawn, NJ, USA). All the chemicals were used as received.

### *N*-(pyridin-4-yl-methylene)pyridin-4-amine (**BPI**)

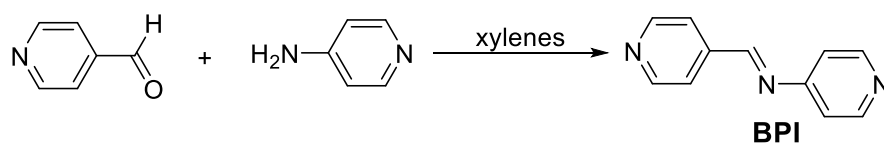

4-aminopyridine (4.235 g, 0.045 mol) and 4-pyridine carboxaldehyde (5 g, 0.046 mol) were heated under reflux in 75 mL of xylenes for 20 h with a Dean-Stark apparatus. The solvent was evaporated under reduced pressure, and the crude product was recrystallized to obtain pure product using petroleum ether or hexanes (2.004 g, 26% yield). Thin, white, needle-shaped crystals suitable for X-ray diffraction were obtained by dissolving **BPI** in a minimum amount of petroleum ether or hexanes over a couple of minutes.<sup>1</sup>

### 4-((pyridin-4-ylmethylene)amino)aniline (**PI-NH<sub>2</sub>**)

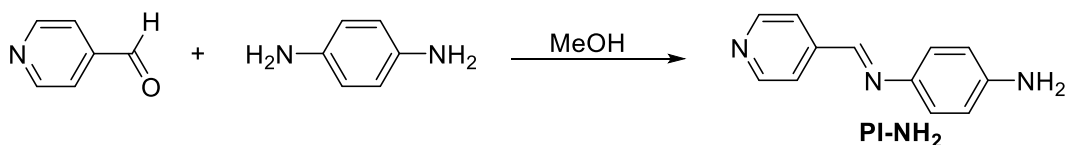

**PI-NH<sub>2</sub>** was prepared by grinding benzene-1,4-diamine (0.86 g, 8 mmol) and 4-pyridine carboxaldehyde (0.86 g, 8 mmol) in 1:1 ratio in the presence of 100  $\mu$ L of methanol using a mortar and pestle for ca. 15 min. The dark yellow solid obtained after grinding was recrystallized in methanol to obtain the pure product (1.39 g, 90% yield). Single crystals suitable for X-ray diffraction were grown by dissolving 10 mg of the pure product in a minimal amount of acetonitrile over a period of two days.

## 2. X-ray Diffraction Information and Data Tables

Data were collected on a Rigaku XtaLAB Synergy-*i* Kappa diffractometer equipped with a PhotonJet-*i* X-ray source operated at 50 W (50kV, 1 mA) to generate either Cu K $\alpha$  radiation ( $\lambda = 1.54178 \text{ \AA}$ ) or Mo K $\alpha$  radiation ( $\lambda = 0.71073 \text{ \AA}$ ) and a HyPix-6000HE HPC detector. Crystals were transferred from the vial and placed on a glass slide in polyisobutylene. A Zeiss Stemi 305 microscope was used to identify a suitable specimen for X-ray diffraction from a representative sample of the material. The crystal and a small amount of the oil were collected on a Hampton Research 20 micron cryoloop and transferred to the instrument where it was placed under a cold nitrogen stream (Oxford 700 series). Data were collected at temperatures of 290 K, 270 K, 250 K, 230 K, 210 K, and 190 K with a transition rate of 2 K/minute between the temperatures. The samples were optically centered with the aid of a video camera to ensure that no translations were observed as the crystal was rotated through all positions. For variable temperature experiments, a new set of images of the crystal and its location were recorded before each data collection. A unit cell collection was then carried out, and a data collection strategy was calculated by *CrysAlisPro*.<sup>3</sup> The crystal was measured for size, morphology, and color.

### *Refinement Details*

After data collection, the unit cell was re-determined using a subset of the full data collection. Intensity data were corrected for Lorentz, polarization, and background effects using *CrysAlisPro*.<sup>3</sup> A numerical absorption correction was applied based on a Gaussian integration over a multifaceted crystal and followed by a semi-empirical correction for adsorption applied using the program *SCALE3 ABSPACK*.<sup>4</sup> The *SHELXL-2014*,<sup>5</sup> series of programs was used for the solution and refinement of the crystal structure. Hydrogen atoms bound to carbon atoms were located in the difference Fourier map and were geometrically constrained using the appropriate AFIX commands.

For the **BPI** structure, atom sites C2 < C9, N2, and N3 were positionally disordered and modeled as split sites A and B. The site occupancies of the two sites were constrained to a total value of 1. At 190 K, the A and B sites refined to 0.49 and 0.51, respectively. From 210 K to 270 K, the A and B sites refined to 0.51 and 0.49, respectively. At 290 K, the A and B sites refined to 0.50 and

0.50, respectively. To help maintain reasonable ADP and bond length values for the disordered sites, the rigid bond restraint RIGU and free variable DFIX restraints were applied. The data/parameter ratio is borderline due to the number of modeled disorder atom sites in the structure.

For the **PI-NH<sub>2</sub>** structure, the hydrogen atoms bound to N1 was allowed to refine their positions while their isotropic displacement parameter was set to ride on N1. For temperatures 290 K, 270 K, 250 K, and 230 K the imine group was undergoing pedal motion. The atoms N2, N3, and C7 < C12 were split into A and B sites and were restrained with an anisotropic displacement parameter similarity (SIMU), rigid bond restraint (RIGU), and free variable DFIX restraints to help maintain reasonable ADP values and bond lengths for the minor components. For temperatures 290 K, 270 K, 250 K, and 230 K the ratio of A to B sites was 0.84:0.16, 0.95:0.05, 0.97:0.03, and 0.98:0.02.

#### *Cooling cycle details for PI-NH<sub>2</sub>*

For the slow cooling cycle, SCXRD data was first collected at 290 K, and the crystal was slowly cooled to 100 K while collecting full data sets every 20 K (Tables S3-S5). For the flash cooling cycle, the crystal was mounted on the instrument at 190 K and a full data set was collected. Then the crystal was warmed to 290 K while collecting full data sets every 20 K, followed by cooling back to 190 K while collecting full data sets every 20 K (Tables S6-S9).

**Table S1.** X-ray data for **BPI** at 290, 270, and 250 K.

| Compound formula                                   | C <sub>11</sub> H <sub>9</sub> N <sub>3</sub> | C <sub>11</sub> H <sub>9</sub> N <sub>3</sub> | C <sub>11</sub> H <sub>9</sub> N <sub>3</sub> |
|----------------------------------------------------|-----------------------------------------------|-----------------------------------------------|-----------------------------------------------|
| Formula Mass                                       | 183.21                                        | 183.21                                        | 183.21                                        |
| Crystal System                                     | Monoclinic                                    | Monoclinic                                    | Monoclinic                                    |
| Space Group                                        | C2/m                                          | C2/m                                          | C2/m                                          |
| a/Å                                                | 15.7226(13)                                   | 15.6931(11)                                   | 15.6639(12)                                   |
| b/Å                                                | 7.1311(6)                                     | 7.1110(5)                                     | 7.0936(6)                                     |
| c/Å                                                | 9.0875(10)                                    | 9.0908(8)                                     | 9.0904(9)                                     |
| $\alpha$ /°                                        | 90                                            | 90                                            | 90                                            |
| $\beta$ /°                                         | 106.081(10)                                   | 105.856(18)                                   | 105.663(9)                                    |
| $\gamma$ /°                                        | 90                                            | 90                                            | 90                                            |
| V/Å <sup>3</sup>                                   | 979.02(16)                                    | 975.88(13)                                    | 972.56(15)                                    |
| $\rho_{\text{calc}}$ / g cm <sup>-3</sup>          | 1.243                                         | 1.247                                         | 1.251                                         |
| T/K                                                | 290.06 (11)                                   | 270.06 (10)                                   | 250.05 (10)                                   |
| Z                                                  | 4                                             | 4                                             | 4                                             |
| Radiation Type                                     | MoK $\alpha$                                  | MoK $\alpha$                                  | MoK $\alpha$                                  |
| Wavelength, Å                                      | 0.71073                                       | 0.71073                                       | 0.71073                                       |
| Absorption coefficient,<br>$\mu$ /mm <sup>-1</sup> | 0.078                                         | 0.078                                         | 0.079                                         |
| F(000)                                             | 384                                           | 384                                           | 384                                           |
| Crystal Size (mm)                                  | 0.282 x 0.163 x 0.035                         | 0.282 x 0.163 x 0.035                         | 0.282 x 0.163 x 0.035                         |
| Reflections collected                              | 8659                                          | 8190                                          | 8449                                          |
| No. of independent<br>reflections                  | 1093                                          | 1091                                          | 1086                                          |
| No. of reflection (I > 2 $\sigma$ (I))             | 767                                           | 786                                           | 808                                           |
| Data/restraints/parameter                          | 1093 / 164/ 145                               | 1091 / 164 / 145                              | 1086 / 164 / 145                              |
| R <sub>int</sub>                                   | 0.0262                                        | 0.0287                                        | 0.0263                                        |
| R1 (I > 2 $\sigma$ (I))                            | 0.0375                                        | 0.0375                                        | 0.0369                                        |
| wR(F2) (I > 2 $\sigma$ (I))                        | 0.1061                                        | 0.1057                                        | 0.1034                                        |
| R1 (all data)                                      | 0.0565                                        | 0.0528                                        | 0.0506                                        |
| wR(F2) (all data)                                  | 0.1174                                        | 0.1151                                        | 0.1118                                        |
| Goodness-of-fit on F <sup>2</sup>                  | 1.026                                         | 1.038                                         | 1.037                                         |
| CCDC deposition number                             | 2072416                                       | 2072415                                       | 2072414                                       |

**Table S2.** X-ray data for **BPI** at 230, 210, and 190 K.

| Compound formula                                   | C <sub>11</sub> H <sub>9</sub> N <sub>3</sub> | C <sub>11</sub> H <sub>9</sub> N <sub>3</sub> | C <sub>11</sub> H <sub>9</sub> N <sub>3</sub> |
|----------------------------------------------------|-----------------------------------------------|-----------------------------------------------|-----------------------------------------------|
| Formula Mass                                       | 183.21                                        | 183.21                                        | 183.21                                        |
| Crystal System                                     | Monoclinic                                    | Monoclinic                                    | Monoclinic                                    |
| Space Group                                        | C2/m                                          | Cm                                            | Cm                                            |
| a/Å                                                | 15.6264(11)                                   | 15.5861(9)                                    | 15.498(2)                                     |
| b/Å                                                | 7.0823(5)                                     | 7.0608(4)                                     | 7.0467(10)                                    |
| c/Å                                                | 9.0843(7)                                     | 9.0691(6)                                     | 9.0692(15)                                    |
| $\alpha$ /°                                        | 90                                            | 90                                            | 90                                            |
| $\beta$ /°                                         | 105.399(8)                                    | 105.198(7)                                    | 104.821(16)                                   |
| $\gamma$ /°                                        | 90                                            | 90                                            | 90                                            |
| V/Å <sup>3</sup>                                   | 969.27(13)                                    | 963.15(11)                                    | 957.5(3)                                      |
| $\rho_{\text{calc}}$ / g cm <sup>-3</sup>          | 1.255                                         | 1.263                                         | 1.271                                         |
| T/K                                                | 230.06 (10)                                   | 210.05 (10)                                   | 190.00 (10)                                   |
| Z                                                  | 4                                             | 4                                             | 4                                             |
| Radiation Type                                     | MoK $\alpha$                                  | MoK $\alpha$                                  | MoK $\alpha$                                  |
| Wavelength, Å                                      | 0.71073                                       | 0.71073                                       | 0.710731                                      |
| Absorption coefficient,<br>$\mu$ /mm <sup>-1</sup> | 0.079                                         | 0.079                                         | 0.080                                         |
| F(000)                                             | 384                                           | 384                                           | 384                                           |
| Crystal size (mm)                                  | 0.282 x 0.163 x 0.035                         | 0.282 x 0.163 x 0.035                         | 0.282 x 0.163 x 0.035                         |
| Reflections collected                              | 8389                                          | 8450                                          | 5921                                          |
| No. of independent<br>reflections                  | 1082                                          | 1076                                          | 1064                                          |
| No. of reflection (I > 2 $\sigma$ (I))             | 838                                           | 859                                           | 766                                           |
| Data/restraints/parameter                          | 1082 / 164 / 145                              | 1076 / 164 / 145                              | 1064 / 164 / 145                              |
| R <sub>int</sub>                                   | 0.0308                                        | 0.0253                                        | 0.0579                                        |
| R1 (I > 2 $\sigma$ (I))                            | 0.0370                                        | 0.385                                         | 0.0784                                        |
| wR(F2) (I > 2 $\sigma$ (I))                        | 0.1056                                        | 0.1083                                        | 0.1941                                        |
| R1 (all data)                                      | 0.0482                                        | 0.0484                                        | 0.0974                                        |
| wR(F2) (all data)                                  | 0.1129                                        | 0.1145                                        | 0.2021                                        |
| Goodness-of-fit on F <sup>2</sup>                  | 1.033                                         | 1.080                                         | 1.143                                         |
| CCDC deposition number                             | 2072413                                       | 2072412                                       | 2072411                                       |

**Table S3.** X-ray data for **PI-NH<sub>2</sub>** at 290, 270, and 250 K (slow cooling cycle).

| Compound formula                                                          | C <sub>12</sub> H <sub>11</sub> N <sub>3</sub>        | C <sub>12</sub> H <sub>11</sub> N <sub>3</sub>        | C <sub>12</sub> H <sub>11</sub> N <sub>3</sub>        |
|---------------------------------------------------------------------------|-------------------------------------------------------|-------------------------------------------------------|-------------------------------------------------------|
| Formula Mass                                                              | 197.24                                                | 197.24                                                | 197.24                                                |
| Crystal System                                                            | Orthorhombic                                          | Orthorhombic                                          | Orthorhombic                                          |
| Space Group                                                               | <i>P</i> 2 <sub>1</sub> 2 <sub>1</sub> 2 <sub>1</sub> | <i>P</i> 2 <sub>1</sub> 2 <sub>1</sub> 2 <sub>1</sub> | <i>P</i> 2 <sub>1</sub> 2 <sub>1</sub> 2 <sub>1</sub> |
| <i>a</i> /Å                                                               | 5.72610(10)                                           | 5.8556(5)                                             | 5.85593(8)                                            |
| <i>b</i> /Å                                                               | 7.54720(10)                                           | 7.4394(6)                                             | 7.39741(11)                                           |
| <i>c</i> /Å                                                               | 23.5464(4)                                            | 23.4466(18)                                           | 23.4532(3)                                            |
| $\alpha$ /°                                                               | 90                                                    | 90                                                    | 90                                                    |
| $\beta$ /°                                                                | 90                                                    | 90                                                    | 90                                                    |
| $\gamma$ /°                                                               | 90                                                    | 90                                                    | 90                                                    |
| <i>V</i> /Å <sup>3</sup>                                                  | 1017.58(3)                                            | 1021.39(14)                                           | 1015.96(3)                                            |
| $\rho_{\text{calc}}$ / g cm <sup>-3</sup>                                 | 1.287                                                 | 1.283                                                 | 1.289                                                 |
| T/K                                                                       | 290 (2)                                               | 270 (2)                                               | 250 (2)                                               |
| <i>Z</i>                                                                  | 4                                                     | 4                                                     | 4                                                     |
| Radiation Type                                                            | CuK $\alpha$                                          | CuK $\alpha$                                          | CuK $\alpha$                                          |
| Wavelength, Å                                                             | 1.54178                                               | 1.54178                                               | 1.54178                                               |
| Absorption coefficient,<br>$\mu$ /mm <sup>-1</sup>                        | 0.631                                                 | 0.629                                                 | 0.632                                                 |
| <i>F</i> (000)                                                            | 416                                                   | 416                                                   | 416                                                   |
| Crystal size (mm)                                                         | 0.174 x 0.112 x 0.035                                 | 0.174 x 0.112 x 0.035                                 | 0.174 x 0.112 x 0.035                                 |
| Reflections collected                                                     | 9716                                                  | 7420                                                  | 9716                                                  |
| No. of independent<br>reflections                                         | 2062                                                  | 2045                                                  | 2053                                                  |
| No. of reflection ( <i>I</i> > 2 $\sigma$ ( <i>I</i> ))                   | 1859                                                  | 1875                                                  | 1937                                                  |
| Data/restraints/parameter                                                 | 2062 / 226 / 207                                      | 2045 / 403 / 206                                      | 2053 / 403 / 206                                      |
| <i>R</i> <sub>int</sub>                                                   | 0.0304                                                | 0.0292                                                | 0.0289                                                |
| <i>R</i> 1 ( <i>I</i> > 2 $\sigma$ ( <i>I</i> ))                          | 0.0311                                                | 0.0319                                                | 0.0274                                                |
| <i>wR</i> ( <i>F</i> <sub>2</sub> ) ( <i>I</i> > 2 $\sigma$ ( <i>I</i> )) | 0.0859                                                | 0.0870                                                | 0.0728                                                |
| <i>R</i> 1 (all data)                                                     | 0.0346                                                | 0.0356                                                | 0.0292                                                |
| <i>wR</i> ( <i>F</i> <sub>2</sub> ) (all data)                            | 0.0887                                                | 0.0890                                                | 0.0733                                                |
| Goodness-of-fit on <i>F</i> <sup>2</sup>                                  | 1.056                                                 | 1.051                                                 | 1.078                                                 |
| CCDC deposition number                                                    | 2072254                                               | 2072255                                               | 2072256                                               |

**Table S4.** X-ray data for **PI-NH<sub>2</sub>** at 230, 210, and 190 K (slow cooling cycle).

| Compound formula                                                           | C <sub>12</sub> H <sub>11</sub> N <sub>3</sub>        | C <sub>12</sub> H <sub>11</sub> N <sub>3</sub>        | C <sub>12</sub> H <sub>11</sub> N <sub>3</sub>        |
|----------------------------------------------------------------------------|-------------------------------------------------------|-------------------------------------------------------|-------------------------------------------------------|
| Formula Mass                                                               | 197.24                                                | 197.24                                                | 197.24                                                |
| Crystal System                                                             | Orthorhombic                                          | Orthorhombic                                          | Orthorhombic                                          |
| Space Group                                                                | <i>P</i> 2 <sub>1</sub> 2 <sub>1</sub> 2 <sub>1</sub> | <i>P</i> 2 <sub>1</sub> 2 <sub>1</sub> 2 <sub>1</sub> | <i>P</i> 2 <sub>1</sub> 2 <sub>1</sub> 2 <sub>1</sub> |
| <i>a</i> /Å                                                                | 5.85038(8)                                            | 5.84449(8)                                            | 5.83819(7)                                            |
| <i>b</i> /Å                                                                | 7.37100(11)                                           | 7.34651(10)                                           | 7.32399(9)                                            |
| <i>c</i> /Å                                                                | 23.4704(3)                                            | 23.4842(3)                                            | 23.4915(3)                                            |
| $\alpha$ /°                                                                | 90                                                    | 90                                                    | 90                                                    |
| $\beta$ /°                                                                 | 90                                                    | 90                                                    | 90                                                    |
| $\gamma$ /°                                                                | 90                                                    | 90                                                    | 90                                                    |
| <i>V</i> /Å <sup>3</sup>                                                   | 1012.12(3)                                            | 1008.33(2)                                            | 1004.47(2)                                            |
| $\rho_{\text{calc}}$ / g cm <sup>-3</sup>                                  | 1.294                                                 | 1.299                                                 | 1.304                                                 |
| T/K                                                                        | 230 (2)                                               | 210 (2)                                               | 190 (2)                                               |
| <i>Z</i>                                                                   | 4                                                     | 4                                                     | 4                                                     |
| Radiation Type                                                             | CuK $\alpha$                                          | CuK $\alpha$                                          | CuK $\alpha$                                          |
| Wavelength, Å                                                              | 1.54178                                               | 1.54178                                               | 1.54178                                               |
| Absorption coefficient,<br>$\mu$ /mm <sup>-1</sup>                         | 0.634                                                 | 0.637                                                 | 0.639                                                 |
| <i>F</i> (000)                                                             | 416                                                   | 416                                                   | 416                                                   |
| Crystal size (mm)                                                          | 0.174 x 0.112 x 0.035                                 | 0.174 x 0.112 x 0.035                                 | 0.174 x 0.112 x 0.035                                 |
| Reflections collected                                                      | 9643                                                  | 9654                                                  | 9593                                                  |
| No. of independent<br>reflections                                          | 2043                                                  | 2033                                                  | 2025                                                  |
| No. of reflection ( <i>I</i> > 2 $\sigma$ ( <i>I</i> ))                    | 1952                                                  | 1956                                                  | 1949                                                  |
| Data/restraints/parameter                                                  | 2043 / 403 / 206                                      | 2033 / 0 / 143                                        | 2025 / 0 / 143                                        |
| <i>R</i> <sub>int</sub>                                                    | 0.0288                                                | 0.0268                                                | 0.0261                                                |
| <i>R</i> 1 ( <i>I</i> > 2 $\sigma$ ( <i>I</i> ))                           | 0.0273                                                | 0.0269                                                | 0.0258                                                |
| w <i>R</i> ( <i>F</i> <sub>2</sub> ) ( <i>I</i> > 2 $\sigma$ ( <i>I</i> )) | 0.0720                                                | 0.0692                                                | 0.0674                                                |
| <i>R</i> 1 (all data)                                                      | 0.0284                                                | 0.0281                                                | 0.0267                                                |
| w <i>R</i> ( <i>F</i> <sub>2</sub> ) (all data)                            | 0.0728                                                | 0.0700                                                | 0.0679                                                |
| Goodness-of-fit on <i>F</i> <sup>2</sup>                                   | 1.113                                                 | 1.055                                                 | 1.048                                                 |
| CCDC deposition number                                                     | 2072257                                               | 2072258                                               | 2072259                                               |



**Table S5.** X-ray data for **PI-NH<sub>2</sub>** at 170, 150, 130 and 100 K (slow cooling cycle).

| Compound formula                                        | C <sub>12</sub> H <sub>11</sub> N <sub>3</sub>        |
|---------------------------------------------------------|-------------------------------------------------------|-------------------------------------------------------|-------------------------------------------------------|-------------------------------------------------------|
| Formula Mass                                            | 197.24                                                | 197.24                                                | 197.24                                                | 197.24                                                |
| Crystal System                                          | Orthorhombic                                          | Orthorhombic                                          | Orthorhombic                                          | Orthorhombic                                          |
| Space Group                                             | <i>P</i> 2 <sub>1</sub> 2 <sub>1</sub> 2 <sub>1</sub> |
| a/Å                                                     | 5.83221(8)                                            | 5.82676(8)                                            | 5.82153(8)                                            | 5.81332(8)                                            |
| b/Å                                                     | 7.30484(11)                                           | 7.28832(12)                                           | 7.27320(13)                                           | 7.24959(14)                                           |
| c/Å                                                     | 23.5004(3)                                            | 23.5058(3)                                            | 23.5087(3)                                            | 23.5153(4)                                            |
| $\alpha$ /°                                             | 90                                                    | 90                                                    | 90                                                    | 90                                                    |
| $\beta$ /°                                              | 90                                                    | 90                                                    | 90                                                    | 90                                                    |
| $\gamma$ /°                                             | 90                                                    | 90                                                    | 90                                                    | 90                                                    |
| V/Å <sup>3</sup>                                        | 1001.20(2)                                            | 998.23(2)                                             | 995.39(3)                                             | 991.03(3)                                             |
| $\rho_{\text{calc}}$ / g cm <sup>-3</sup>               | 1.309                                                 | 1.312                                                 | 1.316                                                 | 1.322                                                 |
| T/K                                                     | 170 (2)                                               | 150 (2)                                               | 130 (2)                                               | 100 (2)                                               |
| Z                                                       | 4                                                     | 4                                                     | 4                                                     | 4                                                     |
| Radiation Type                                          | CuK $\alpha$                                          | CuK $\alpha$                                          | CuK $\alpha$                                          | CuK $\alpha$                                          |
| Wavelength, Å                                           | 1.54178                                               | 1.54178                                               | 1.54178                                               | 1.54178                                               |
| Absorption coefficient,<br>$\mu$ /mm <sup>-1</sup>      | 0.641                                                 | 0.643                                                 | 0.645                                                 | 0.648                                                 |
| F(000)                                                  | 416                                                   | 416                                                   | 416                                                   | 416                                                   |
| Crystal size (mm)                                       | 0.174 x 0.112 x 0.035                                 |
| Reflections collected                                   | 9526                                                  | 9524                                                  | 9477                                                  | 9303                                                  |
| No. of independent<br>reflections                       | 2014                                                  | 2008                                                  | 2005                                                  | 1998                                                  |
| No. of reflection ( <i>I</i> > 2 $\sigma$ ( <i>I</i> )) | 1943                                                  | 1944                                                  | 1933                                                  | 1927                                                  |
| Data/restraints/parameter                               | 2014 / 0 / 143                                        | 2008 / 0 / 143                                        | 2005 / 0 / 143                                        | 1998 / 0 / 143                                        |
| R <sub>int</sub>                                        | 0.0255                                                | 0.0255                                                | 0.0283                                                | 0.0329                                                |
| R1 ( <i>I</i> > 2 $\sigma$ ( <i>I</i> ))                | 0.0270                                                | 0.0270                                                | 0.0279                                                | 0.0314                                                |
| wR(F2) ( <i>I</i> > 2 $\sigma$ ( <i>I</i> ))            | 0.0686                                                | 0.0702                                                | 0.0752                                                | 0.0859                                                |
| R1 (all data)                                           | 0.0280                                                | 0.0279                                                | 0.0289                                                | 0.0325                                                |
| wR(F2) (all data)                                       | 0.0693                                                | 0.0708                                                | 0.0760                                                | 0.0869                                                |
| Goodness-of-fit on F <sup>2</sup>                       | 1.083                                                 | 1.066                                                 | 1.072                                                 | 1.076                                                 |
| CCDC deposition number                                  | 2072260                                               | 2072261                                               | 2072262                                               | 2072263                                               |

**Table S6.** X-ray data for **PI-NH<sub>2</sub>** at 190, 210 and 230 K (flash cooling cycle).

|                                                                            |                                                       |                                                       |                                                       |
|----------------------------------------------------------------------------|-------------------------------------------------------|-------------------------------------------------------|-------------------------------------------------------|
| Compound formula                                                           | C <sub>12</sub> H <sub>11</sub> N <sub>3</sub>        | C <sub>12</sub> H <sub>11</sub> N <sub>3</sub>        | C <sub>12</sub> H <sub>11</sub> N <sub>3</sub>        |
| Formula Mass                                                               | 197.24                                                | 197.24                                                | 197.24                                                |
| Crystal System                                                             | Orthorhombic                                          | Orthorhombic                                          | Orthorhombic                                          |
| Space Group                                                                | <i>P</i> 2 <sub>1</sub> 2 <sub>1</sub> 2 <sub>1</sub> | <i>P</i> 2 <sub>1</sub> 2 <sub>1</sub> 2 <sub>1</sub> | <i>P</i> 2 <sub>1</sub> 2 <sub>1</sub> 2 <sub>1</sub> |
| <i>a</i> /Å                                                                | 5.66850(5)                                            | 5.67404(5)                                            | 5.8323(8)                                             |
| <i>b</i> /Å                                                                | 7.45207(6)                                            | 7.47072(6)                                            | 7.3764(7)                                             |
| <i>c</i> /Å                                                                | 23.56855(19)                                          | 23.5754(2)                                            | 23.496(3)                                             |
| $\alpha$ /°                                                                | 90                                                    | 90                                                    | 90                                                    |
| $\beta$ /°                                                                 | 90                                                    | 90                                                    | 90                                                    |
| $\gamma$ /°                                                                | 90                                                    | 90                                                    | 90                                                    |
| <i>V</i> /Å <sup>3</sup>                                                   | 995.585(14)                                           | 999.343(15)                                           | 1010.8(2)                                             |
| $\rho_{\text{calc}}$ / g cm <sup>-3</sup>                                  | 1.316                                                 | 1.311                                                 | 1.296                                                 |
| T/K                                                                        | 190 (2)                                               | 210 (2)                                               | 230 (2)                                               |
| <i>Z</i>                                                                   | 4                                                     | 4                                                     | 4                                                     |
| Radiation Type                                                             | CuK $\alpha$                                          | CuK $\alpha$                                          | CuK $\alpha$                                          |
| Wavelength, Å                                                              | 1.54178                                               | 1.54178                                               | 1.54178                                               |
| Absorption coefficient,<br>$\mu$ /mm <sup>-1</sup>                         | 0.645                                                 | 0.642                                                 | 0.635                                                 |
| <i>F</i> (000)                                                             | 416                                                   | 416                                                   | 416                                                   |
| Crystal size (mm)                                                          | 0.150 x 0.103 x 0.052                                 | 0.150 x 0.103 x 0.052                                 | 0.150 x 0.103 x 0.052                                 |
| Reflections collected                                                      | 18669                                                 | 18712                                                 | 8670                                                  |
| No. of independent<br>reflections                                          | 2085                                                  | 2092                                                  | 1998                                                  |
| No. of reflection ( <i>I</i> > 2 $\sigma$ ( <i>I</i> ))                    | 2021                                                  | 2018                                                  | 1626                                                  |
| Data/restraints/parameter                                                  | 2085 / 0 / 145                                        | 2092 / 0 / 145                                        | 1998 / 2 / 142                                        |
| <i>R</i> <sub>int</sub>                                                    | 0.0384                                                | 0.0400                                                | 0.1761                                                |
| <i>R</i> 1 ( <i>I</i> > 2 $\sigma$ ( <i>I</i> ))                           | 0.0289                                                | 0.0306                                                | 0.0825                                                |
| w <i>R</i> ( <i>F</i> <sup>2</sup> ) ( <i>I</i> > 2 $\sigma$ ( <i>I</i> )) | 0.0792                                                | 0.0827                                                | 0.2013                                                |
| <i>R</i> 1 (all data)                                                      | 0.0296                                                | 0.0317                                                | 0.1002                                                |
| w <i>R</i> ( <i>F</i> <sup>2</sup> ) (all data)                            | 0.0798                                                | 0.0838                                                | 0.2314                                                |
| Goodness-of-fit on <i>F</i> <sup>2</sup>                                   | 1.082                                                 | 1.072                                                 | 1.046                                                 |
| CCDC deposition number                                                     | 2072417                                               | 2072418                                               | 2072420                                               |

**Table S7.** X-ray data for **PI-NH<sub>2</sub>** at 250, 270, and 290 K (flash cooling cycle).

|                                               |                                                       |                                                       |                                                       |
|-----------------------------------------------|-------------------------------------------------------|-------------------------------------------------------|-------------------------------------------------------|
| Compound formula                              | C <sub>12</sub> H <sub>11</sub> N <sub>3</sub>        | C <sub>12</sub> H <sub>11</sub> N <sub>3</sub>        | C <sub>12</sub> H <sub>11</sub> N <sub>3</sub>        |
| Formula Mass                                  | 197.24                                                | 197.24                                                | 197.24                                                |
| Crystal System                                | Orthorhombic                                          | Orthorhombic                                          | Orthorhombic                                          |
| Space Group                                   | <i>P</i> 2 <sub>1</sub> 2 <sub>1</sub> 2 <sub>1</sub> | <i>P</i> 2 <sub>1</sub> 2 <sub>1</sub> 2 <sub>1</sub> | <i>P</i> 2 <sub>1</sub> 2 <sub>1</sub> 2 <sub>1</sub> |
| a/Å                                           | 5.85572(6)                                            | 5.86140(6)                                            | 5.86556(7)                                            |
| b/Å                                           | 7.39661(7)                                            | 7.42624(8)                                            | 7.46244(9)                                            |
| c/Å                                           | 23.4514(2)                                            | 23.4280(3)                                            | 23.3965(3)                                            |
| α/°                                           | 90                                                    | 90                                                    | 90                                                    |
| β/°                                           | 90                                                    | 90                                                    | 90                                                    |
| γ/°                                           | 90                                                    | 90                                                    | 90                                                    |
| V/Å <sup>3</sup>                              | 1015.738(18)                                          | 995.585(14)                                           | 1024.09(2)                                            |
| ρ <sub>calc</sub> / g cm <sup>-3</sup>        | 1.290                                                 | 1.285                                                 | 1.279                                                 |
| T/K                                           | 250 (2)                                               | 270 (2)                                               | 290 (2)                                               |
| Z                                             | 4                                                     | 4                                                     | 4                                                     |
| Radiation Type                                | CuKα                                                  | CuKα                                                  | CuKα                                                  |
| Wavelength, Å                                 | 1.54178                                               | 1.54178                                               | 1.54178                                               |
| Absorption coefficient,<br>μ/mm <sup>-1</sup> | 0.632                                                 | 0.630                                                 | 0.627                                                 |
| F(000)                                        | 416                                                   | 416                                                   | 416                                                   |
| Crystal size (mm)                             | 0.150 x 0.103 x 0.052                                 | 0.150 x 0.103 x 0.052                                 | 0.150 x 0.103 x 0.052                                 |
| Reflections collected                         | 19288                                                 | 18668                                                 | 16960                                                 |
| No. of independent<br>reflections             | 2122                                                  | 2131                                                  | 2117                                                  |
| No. of reflection (I > 2σ(I))                 | 2011                                                  | 1976                                                  | 1895                                                  |
| Data/restraints/parameter                     | 2122 / 403 / 206                                      | 2131 / 403 / 206                                      | 2117 / 403 / 206                                      |
| R <sub>int</sub>                              | 0.0416                                                | 0.0431                                                | 0.0448                                                |
| R1 (I > 2σ(I))                                | 0.0294                                                | 0.0306                                                | 0.0333                                                |
| wR(F2) (I > 2σ(I))                            | 0.0786                                                | 0.0818                                                | 0.0929                                                |
| R1 (all data)                                 | 0.0309                                                | 0.0331                                                | 0.0371                                                |
| wR(F2) (all data)                             | 0.0799                                                | 0.0844                                                | 0.0963                                                |
| Goodness-of-fit on F <sup>2</sup>             | 1.047                                                 | 1.053                                                 | 1.050                                                 |
| CCDC deposition number                        | 2072421                                               | 2072422                                               | 2072423                                               |

**Table S8.** X-ray data for **PI-NH<sub>2</sub>** at 270, 250, and 230 K (flash cooling cycle).

|                                                                            |                                                       |                                                       |                                                       |
|----------------------------------------------------------------------------|-------------------------------------------------------|-------------------------------------------------------|-------------------------------------------------------|
| Compound formula                                                           | C <sub>12</sub> H <sub>11</sub> N <sub>3</sub>        | C <sub>12</sub> H <sub>11</sub> N <sub>3</sub>        | C <sub>12</sub> H <sub>11</sub> N <sub>3</sub>        |
| Formula Mass                                                               | 197.24                                                | 197.24                                                | 197.24                                                |
| Crystal System                                                             | Orthorhombic                                          | Orthorhombic                                          | Orthorhombic                                          |
| Space Group                                                                | <i>P</i> 2 <sub>1</sub> 2 <sub>1</sub> 2 <sub>1</sub> | <i>P</i> 2 <sub>1</sub> 2 <sub>1</sub> 2 <sub>1</sub> | <i>P</i> 2 <sub>1</sub> 2 <sub>1</sub> 2 <sub>1</sub> |
| <i>a</i> /Å                                                                | 5.86137(6)                                            | 5.85561(6)                                            | 5.85010(6)                                            |
| <i>b</i> /Å                                                                | 7.42616(8)                                            | 7.39670(7)                                            | 7.36978(7)                                            |
| <i>c</i> /Å                                                                | 23.4265(3)                                            | 23.4494(2)                                            | 23.4676(2)                                            |
| $\alpha$ /°                                                                | 90                                                    | 90                                                    | 90                                                    |
| $\beta$ /°                                                                 | 90                                                    | 90                                                    | 90                                                    |
| $\gamma$ /°                                                                | 90                                                    | 90                                                    | 90                                                    |
| <i>V</i> /Å <sup>3</sup>                                                   | 1019.695(19)                                          | 1015.647(17)                                          | 1011.783(16)                                          |
| $\rho_{\text{calc}}$ / g cm <sup>-3</sup>                                  | 1.285                                                 | 1.290                                                 | 1.295                                                 |
| T/K                                                                        | 270 (2)                                               | 250 (2)                                               | 230 (2)                                               |
| <i>Z</i>                                                                   | 4                                                     | 4                                                     | 4                                                     |
| Radiation Type                                                             | CuK $\alpha$                                          | CuK $\alpha$                                          | CuK $\alpha$                                          |
| Wavelength, Å                                                              | 1.54178                                               | 1.54178                                               | 1.54178                                               |
| Absorption coefficient,<br>$\mu$ /mm <sup>-1</sup>                         | 0.630                                                 | 0.632                                                 | 0.635                                                 |
| F(000)                                                                     | 416                                                   | 416                                                   | 416                                                   |
| Crystal size (mm)                                                          | 0.150 x 0.103 x 0.052                                 | 0.150 x 0.103 x 0.052                                 | 0.150 x 0.103 x 0.052                                 |
| Reflections collected                                                      | 18569                                                 | 19051                                                 | 19324                                                 |
| No. of independent<br>reflections                                          | 2128                                                  | 2119                                                  | 2107                                                  |
| No. of reflection ( <i>I</i> > 2 $\sigma$ ( <i>I</i> ))                    | 1970                                                  | 2002                                                  | 2009                                                  |
| Data/restraints/parameter                                                  | 2128 / 403 / 206                                      | 2119 / 403 / 206                                      | 2107 / 403 / 206                                      |
| <i>R</i> <sub>int</sub>                                                    | 0.0432                                                | 0.0433                                                | 0.0426                                                |
| <i>R</i> 1 ( <i>I</i> > 2 $\sigma$ ( <i>I</i> ))                           | 0.0305                                                | 0.0299                                                | 0.0282                                                |
| w <i>R</i> ( <i>F</i> <sup>2</sup> ) ( <i>I</i> > 2 $\sigma$ ( <i>I</i> )) | 0.0837                                                | 0.0819                                                | 0.0751                                                |
| <i>R</i> 1 (all data)                                                      | 0.0331                                                | 0.0316                                                | 0.0297                                                |
| w <i>R</i> ( <i>F</i> <sup>2</sup> ) (all data)                            | 0.0863                                                | 0.0835                                                | 0.0764                                                |
| Goodness-of-fit on <i>F</i> <sup>2</sup>                                   | 1.042                                                 | 1.059                                                 | 1.053                                                 |
| CCDC deposition number                                                     | 2072424                                               | 2072425                                               | 2072426                                               |

**Table S9.** X-ray data for **PI-NH<sub>2</sub>** at 210 and 190 K (flash cooling cycle).

|                                                         |                                                       |                                                       |
|---------------------------------------------------------|-------------------------------------------------------|-------------------------------------------------------|
| Compound formula                                        | C <sub>12</sub> H <sub>11</sub> N <sub>3</sub>        | C <sub>12</sub> H <sub>11</sub> N <sub>3</sub>        |
| Formula Mass                                            | 197.24                                                | 197.24                                                |
| Crystal System                                          | Orthorhombic                                          | Orthorhombic                                          |
| Space Group                                             | <i>P</i> 2 <sub>1</sub> 2 <sub>1</sub> 2 <sub>1</sub> | <i>P</i> 2 <sub>1</sub> 2 <sub>1</sub> 2 <sub>1</sub> |
| a/Å                                                     | 5.84375(5)                                            | 5.83741(5)                                            |
| b/Å                                                     | 7.34622(6)                                            | 7.32430(6)                                            |
| c/Å                                                     | 23.48048(20)                                          | 23.48978(19)                                          |
| $\alpha$ /°                                             | 90                                                    | 90                                                    |
| $\beta$ /°                                              | 90                                                    | 90                                                    |
| $\gamma$ /°                                             | 90                                                    | 90                                                    |
| V/Å <sup>3</sup>                                        | 1008.005(14)                                          | 1004.304(14)                                          |
| $\rho_{\text{calc}}$ / g cm <sup>-3</sup>               | 1.300                                                 | 1.304                                                 |
| T/K                                                     | 210 (2)                                               | 190 (2)                                               |
| Z                                                       | 4                                                     | 4                                                     |
| Radiation Type                                          | CuK $\alpha$                                          | CuK $\alpha$                                          |
| Wavelength, Å                                           | 1.54178                                               | 1.54178                                               |
| Absorption coefficient,<br>$\mu$ /mm <sup>-1</sup>      | 0.637                                                 | 0.639                                                 |
| F(000)                                                  | 416                                                   | 416                                                   |
| Crystal size (mm)                                       | 0.150 x 0.103 x 0.052                                 | 0.150 x 0.103 x 0.052                                 |
| Reflections collected                                   | 19537                                                 | 19699                                                 |
| No. of independent<br>reflections                       | 2112                                                  | 2105                                                  |
| No. of reflection ( <i>I</i> > 2 $\sigma$ ( <i>I</i> )) | 2032                                                  | 2031                                                  |
| Data/restraints/parameter                               | 2112 / 0 / 143                                        | 2105 / 0 / 143                                        |
| R <sub>int</sub>                                        | 0.0411                                                | 0.0404                                                |
| R1 ( <i>I</i> > 2 $\sigma$ ( <i>I</i> ))                | 0.0279                                                | 0.0274                                                |
| wR(F2) ( <i>I</i> > 2 $\sigma$ ( <i>I</i> ))            | 0.0734                                                | 0.0725                                                |
| R1 (all data)                                           | 0.0289                                                | 0.0283                                                |
| wR(F2) (all data)                                       | 0.0742                                                | 0.0732                                                |
| Goodness-of-fit on F <sup>2</sup>                       | 1.072                                                 | 1.095                                                 |
| CCDC deposition number                                  | 2072427                                               | 2072428                                               |

### 3. Thermal Expansion Data and Intermolecular Interaction Distances

The thermal expansion coefficients were calculated using the PASCAL program.<sup>6</sup> The unit cell parameters from the crystallographic data sets collected at 290, 270, 250, 230, 210, and 190 K were used for the thermal expansion calculations.

**Table S10.** Thermal expansion coefficients for **BPI** with errors denoted in the parentheses and approximate crystallographic axes denoted in brackets.

| Crystal    | $\alpha_{x_1}$ (MK <sup>-1</sup> )<br>[axis] | $\alpha_{x_2}$ (MK <sup>-1</sup> )<br>[axis] | $\alpha_{x_3}$ (MK <sup>-1</sup> )<br>[axis] | $\alpha_v$ (MK <sup>-1</sup> ) |
|------------|----------------------------------------------|----------------------------------------------|----------------------------------------------|--------------------------------|
| <b>BPI</b> | -73 (5)<br>[-1 0 -2]                         | 118 (3)<br>[0 1 0]                           | 176 (16)<br>[-4 0 3]                         | 228 (14)                       |

**Table S11.** Intermolecular interaction distances within **BPI** that contribute to the thermal expansion parameters.

| Interaction                                                     | 290 K                                 | 190 K | $\Delta$ (Å) |
|-----------------------------------------------------------------|---------------------------------------|-------|--------------|
| Centroid-centroid distance between molecules in adjacent sheets | 6.062 (arrow 1 in Fig. 3b, main text) | 6.156 | -0.094       |
|                                                                 | 5.050 (arrow 2 in Fig. 3b, main text) | 4.899 | 0.151        |
| C-H(imine)···N(pyr) interaction                                 | 3.618                                 | 3.650 | -0.032       |
| C-H( $\beta$ )···N(pyr) interactions between sheets             | 3.782                                 | 3.863 | -0.081       |
| C-H( $\alpha$ )···N(pyr) interactions                           | 3.638                                 | 3.586 | 0.052        |
| C-H( $\beta$ )···N(pyr) interactions within sheet               | 3.556                                 | 3.516 | 0.04         |
| C-H( $\beta$ )··· $\pi$ interactions                            | 3.632                                 | 3.489 | 0.143        |
| $\pi$ ··· $\pi$ interactions                                    | 3.969                                 | 3.927 | 0.042        |

#### 4. TGA and DSC curves

TGA data were collected on a Mettler Toledo TGA2. The samples were heated from 25 to 600 °C at 10 K/min heating rate in nitrogen gas at 20 mL/min flow rate. DSC data were collected on a Mettler Toledo DSC 823 with intra cooler (freon cooler). The sample was cooled from 25 to -65 °C at 20 K/min and warmed back to 25 °C at 10 K/min. The cycle was repeated twice. No discernible transition was observed for the sample.

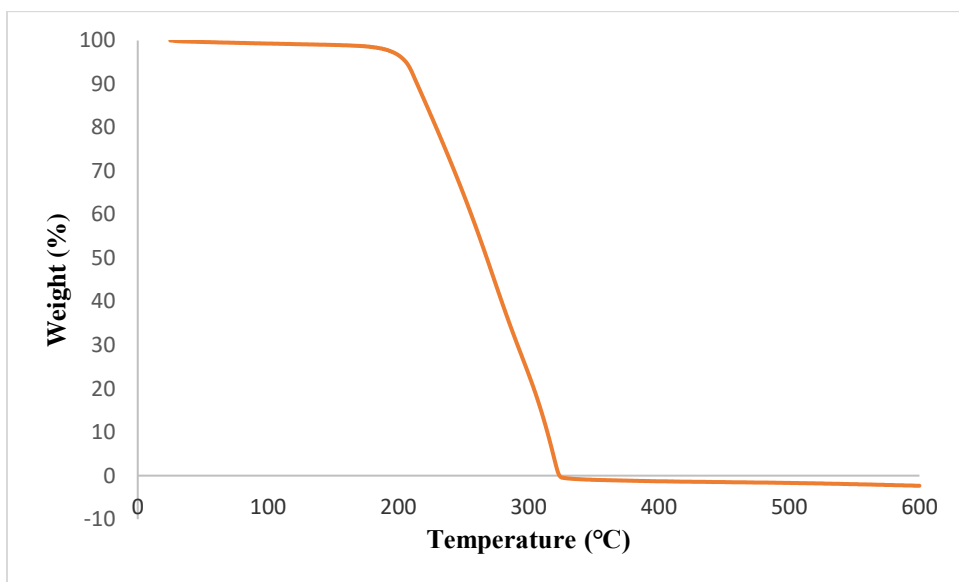

**Figure S1.** TGA curve for **PI-NH<sub>2</sub>**.

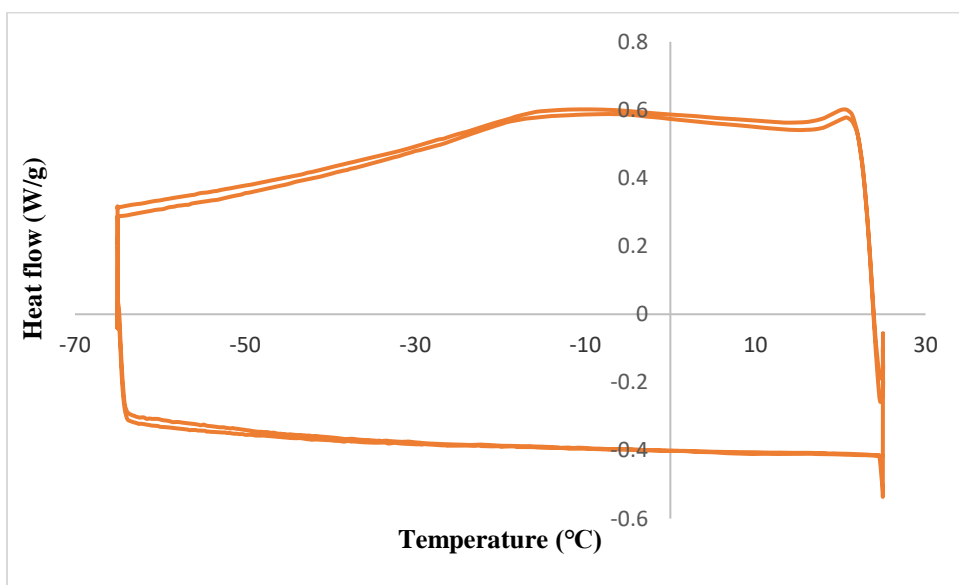

**Figure S2.** DSC curve for **PI-NH<sub>2</sub>**.

## 5. Expansivity Indicatrix Diagram

| Axes  | $\alpha(\text{MK}^{-1})$ | $\sigma\alpha(\text{MK}^{-1})$ | Direction |        |         |
|-------|--------------------------|--------------------------------|-----------|--------|---------|
|       |                          |                                | a         | b      | c       |
| $X_1$ | -73.2390                 | 5.3000                         | -0.3592   | 0.0000 | -0.9333 |
| $X_2$ | 118.3735                 | 2.6017                         | 0.0000    | 1.0000 | -0.0000 |
| $X_3$ | 175.8093                 | 16.0165                        | -0.7713   | 0.0000 | 0.6365  |
| V     | 227.7485                 | 13.9108                        |           |        |         |

### Expansivity Indicatrix

The indicatrix has units of  $\text{MK}^{-1}$ .

|            |            |            |             |
|------------|------------|------------|-------------|
| Rotate +x  | Rotate -x  | Rotate +z  | Rotate -z   |
| Down $X_1$ | Down $X_2$ | Down $X_3$ | Value X: 30 |

Value Z: 60

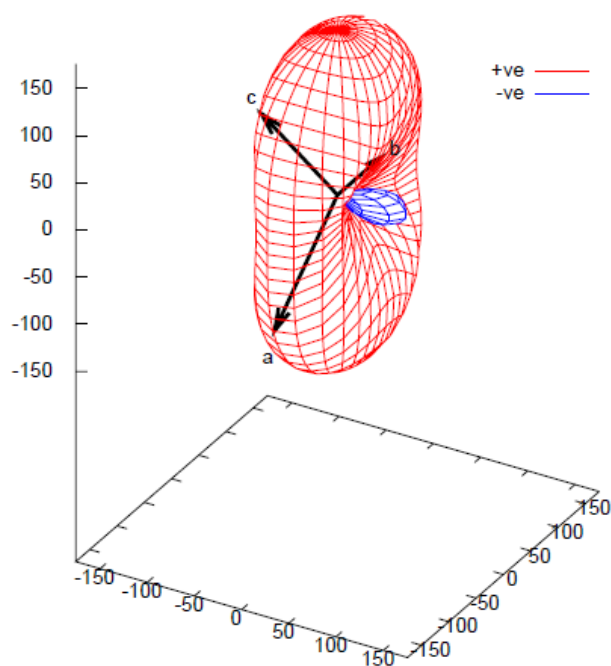

**Figure S3.** Thermal expansivity indicatrix for **BPI**.



## 6. Solution NMR Spectra of Materials

Single crystals of **BPI** and recrystallized solid **PI-NH<sub>2</sub>** were dissolved in CDCl<sub>3</sub> for NMR experiments. NMR data was collected using a JOEL ECS 400 MHZ Spectrometer.

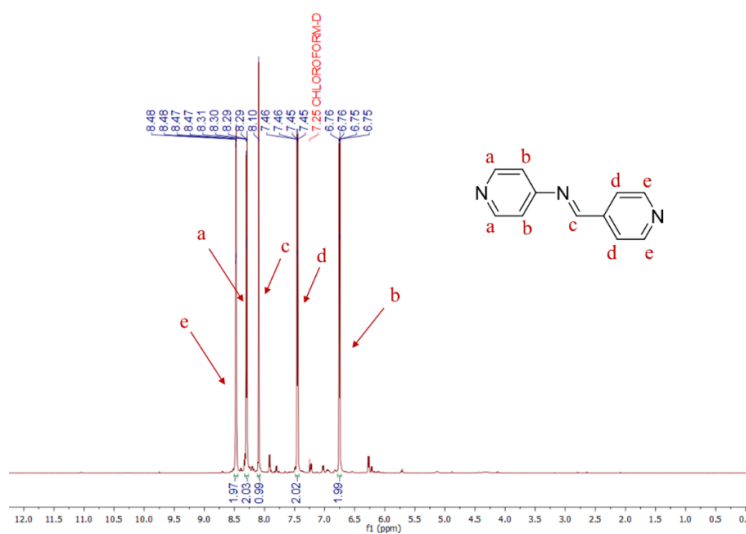

**Figure S4.** <sup>1</sup>H NMR spectrum of **BPI**.

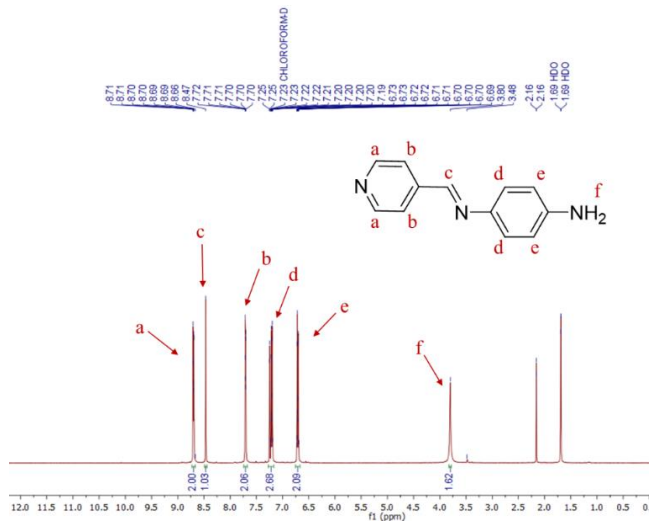

**Figure S5.** <sup>1</sup>H NMR spectrum of **PI-NH<sub>2</sub>**.

## 7. Variation of the Unit Cell Parameters

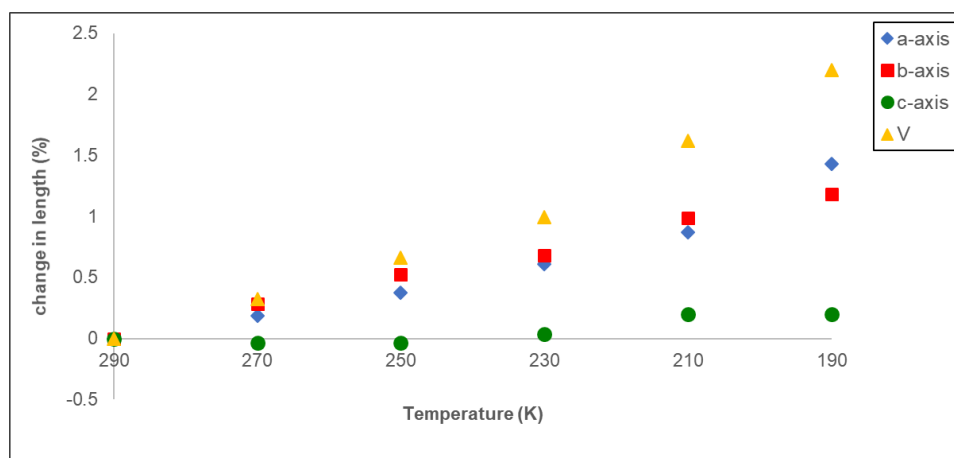

**Figure S6.** Percent change in length as a function of temperature for **BPI**. 290 K is used as the reference point.

## 8. Images Showing Structural Changes as a Function of Temperature

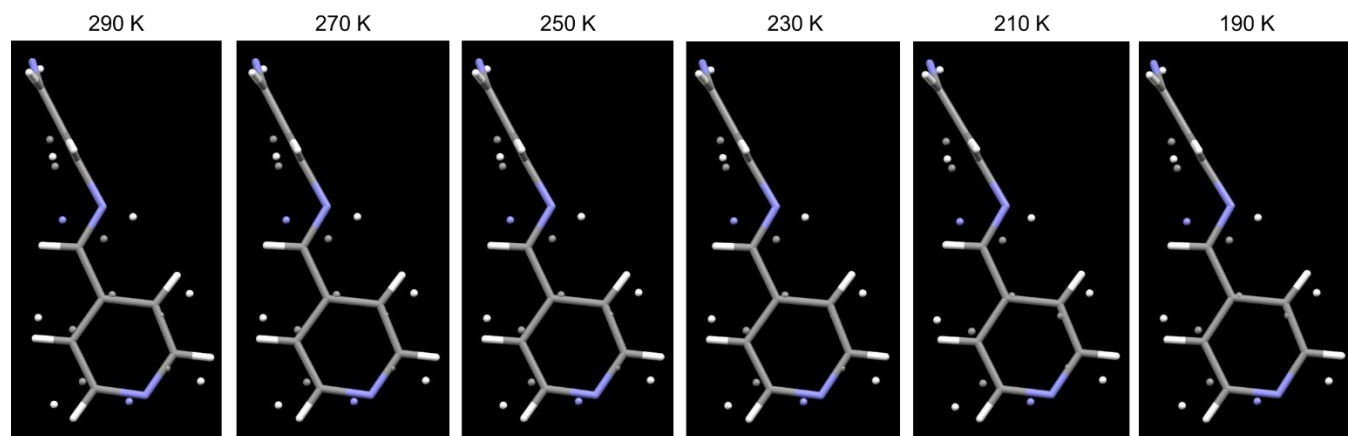

**Figure S7.** Crystal structure of **BPI** as a function of temperature. Disordered atom sites are shown with dots.

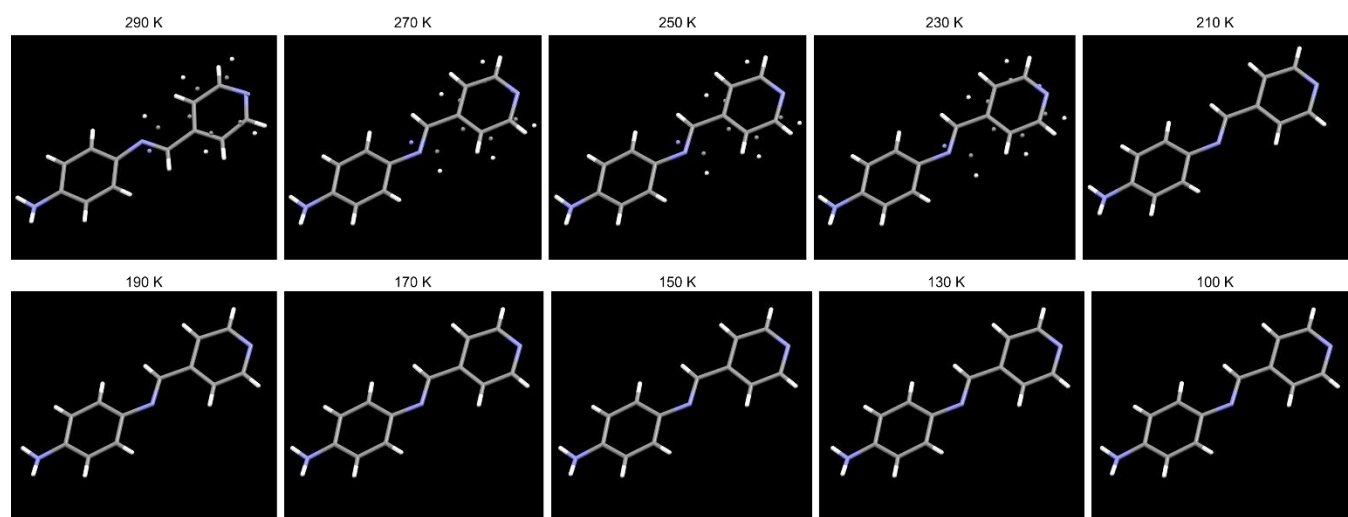

**Figure S8.** Crystal structure of **PI-NH<sub>2</sub>** as a function of temperature during the slow cooling cycle from 290-100 K. Disordered atom sites are shown with dots.

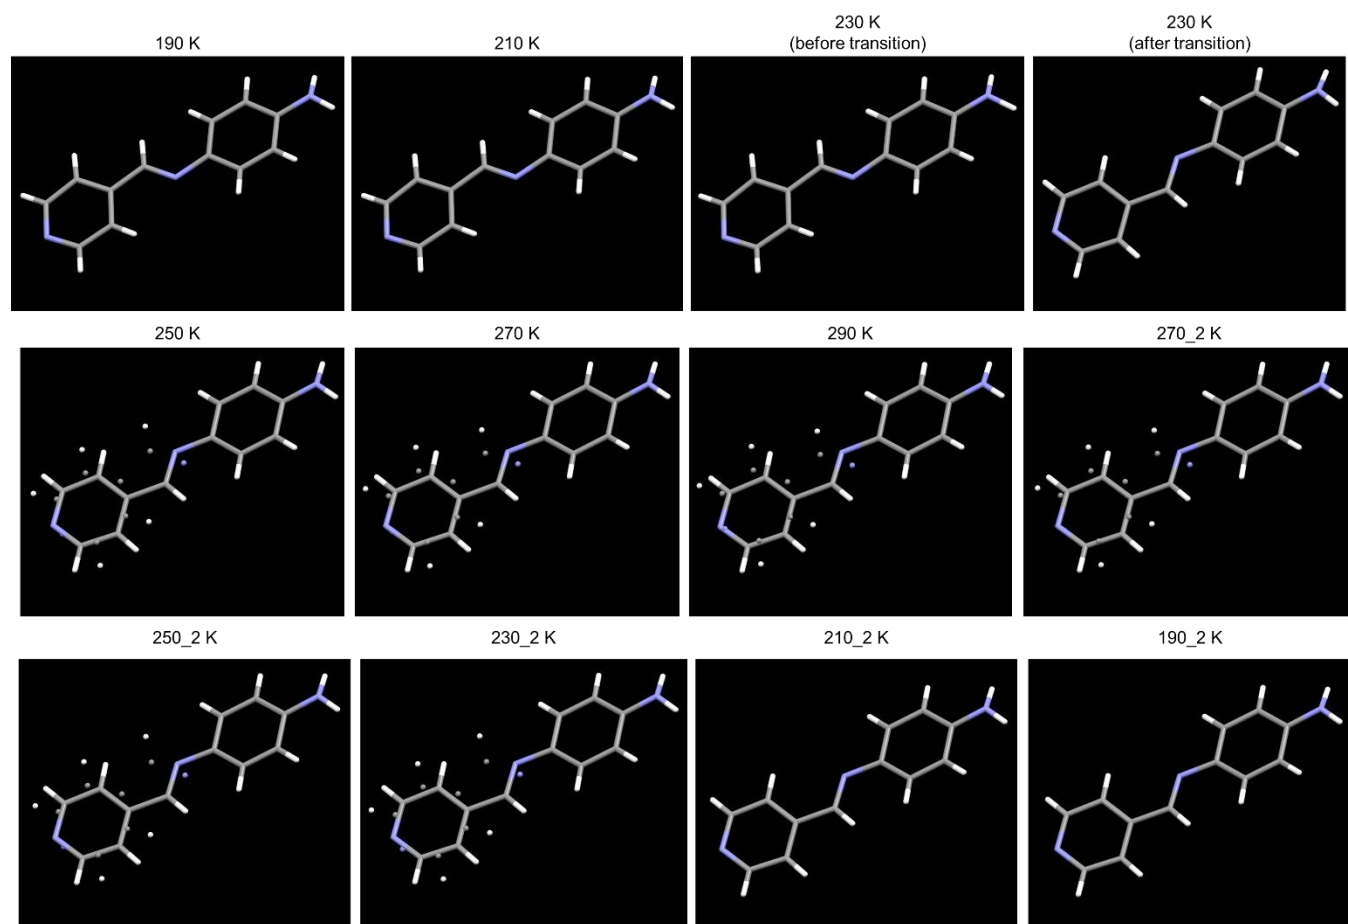

**Figure S9.** Crystal structure of **PI-NH<sub>2</sub>** as a function of temperature during the flash cooling-heating-cooling cycle. The cycle starts at 190 K, heats to 290 K, then cools to 190 K. The images are in cycle order from left to right. Disordered atom sites are shown with dots.

290 K showing:  
 $[-1\ 0\ -2]$  ( $X_1$ ) and  
 $[-4\ 0\ 3]$  ( $X_3$ ) planes.  
 $X_2$  corresponds to the b axis  
and goes into the page.

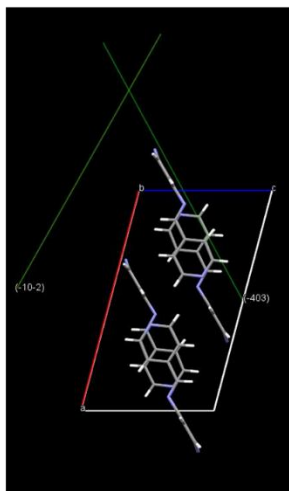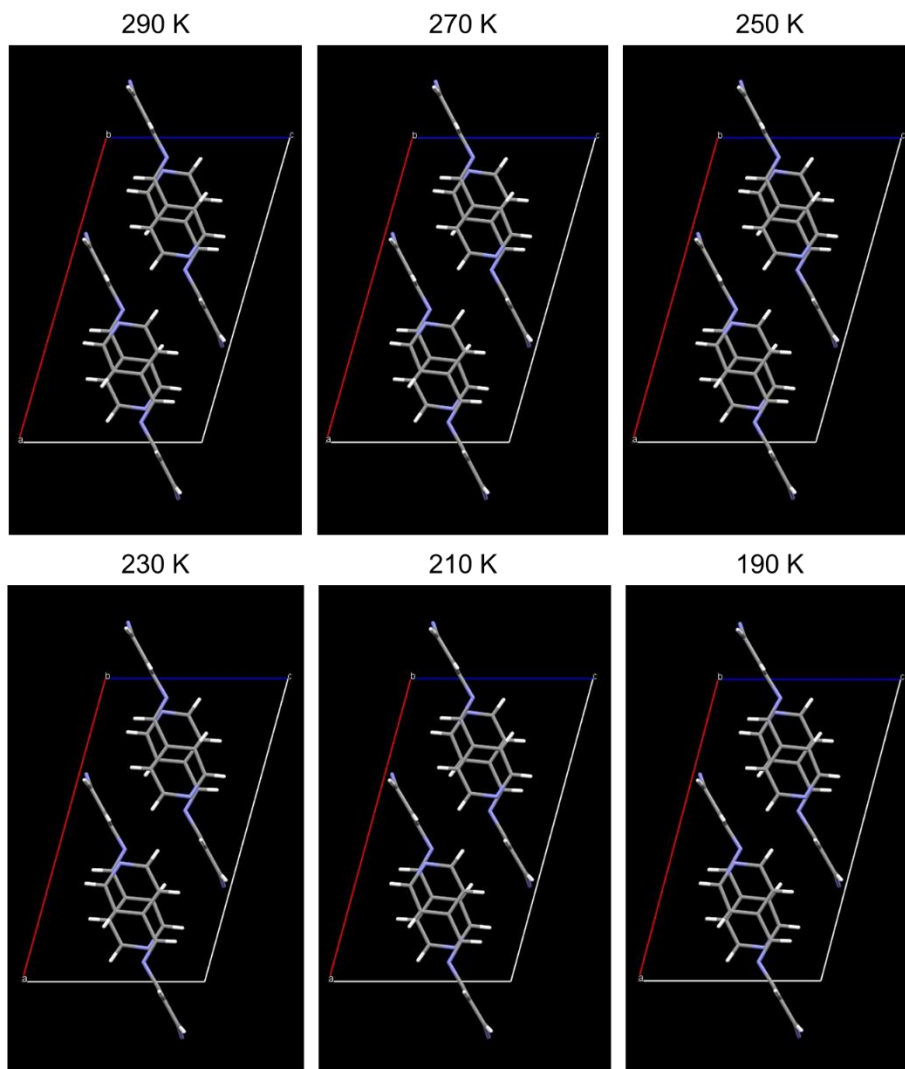

**Figure S10.** Unit cell packing of **BPI** as a function of temperature. Disordered sites are omitted for clarity. TE axes are highlighted in the left image.

## 9. References

- (1) J. E. Rockley, L. A. Summers, *Aust. J. Chem.* 1980, **33**, 1397-1400.
- (2) CrysAlis<sup>Pro</sup> (2018) Oxford Diffraction Ltd.
- (3) SCALE3 ABSPACK (2005) Oxford Diffraction Ltd.
- (4) G. M. Sheldrick, *Acta. Cryst.* 2015, **C71**, 3-8.
- (5) M. J. Cliffe, A. L. Goodwin, *J. Appl. Cryst.* 2012, **45**, 1321-1329.
